# Supplementary material
Source: Springer Nature journal article supplement (https://www.springermedizin.de/resource/supplementary/12891_2011_1447_MOESM3_ESM.pdf/9507910)

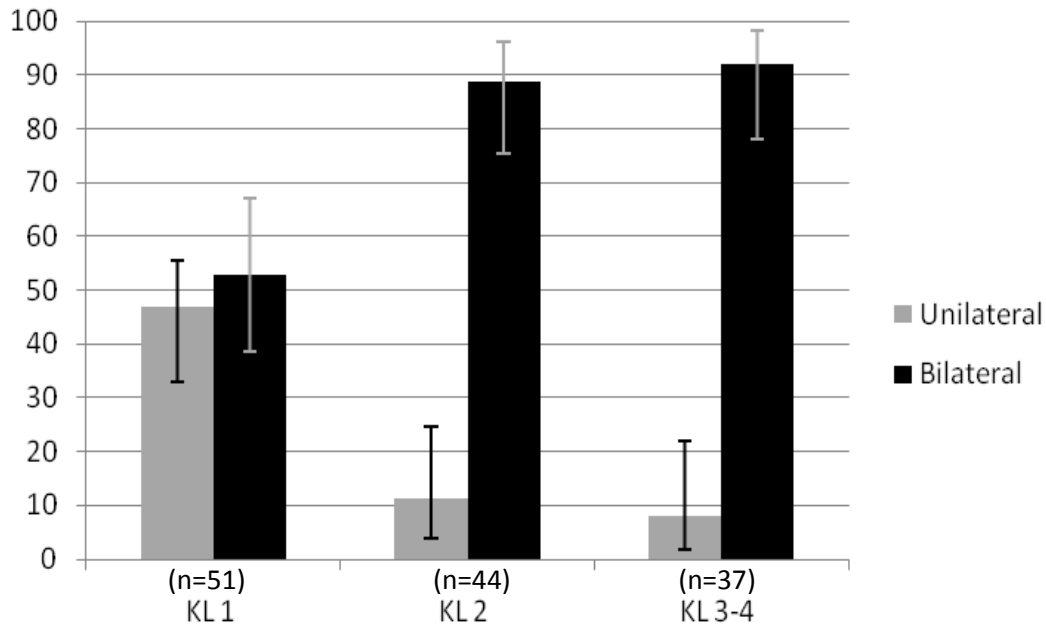

Supplement: MOESM3 [file 9507910]
